# Supplementary material for: Smart Drug-Delivery System of Upconversion Nanoparticles Coated with Mesoporous Silica for Controlled Release
Source: MDPI journal article supplement (doi:10.3390/pharmaceutics15010089), 2022-12-27
Supplement: s1 [file s1]

Electronic Supplementary Material (ESI) for *Pharmaceutics*

# Smart Drug-Delivery System of Upconversion Nanoparticles Coated with Mesoporous Silica for Controlled Release

Yanan Huang<sup>1,2</sup>, Ziqing Du<sup>1</sup>, Guochen Bao<sup>1</sup>, Guocheng Fang<sup>1</sup>, Matthew Cappadona<sup>1</sup>, Lana McClements<sup>3</sup>, Bernard E. Tuch<sup>4,5</sup>, Hongxu Lu<sup>6,\*</sup> and Xiaoxue Xu<sup>1,7,\*</sup>

<sup>1</sup> School of Mathematical and Physical Sciences, Faculty of Science, University of Technology Sydney, Sydney, NSW 2007, Australia

<sup>2</sup> Department of Chemistry, Shanghai Key Lab of Molecular Catalysis and Innovative Materials, iChEM, Fudan University, Shanghai 200437, China

<sup>3</sup> School of Life Sciences & Institute for Biomedical Materials and Devices, Faculty of Science, University of Technology Sydney, Sydney, NSW 2007, Australia

<sup>4</sup> Australia Foundation for Diabetes Research, Sydney, NSW 2007, Australia

<sup>5</sup> Department of Diabetes, Central Clinical School, Faculty of Medicine, Nursing & Health Sciences, Monash University, Melbourne, VIC 3800, Australia

<sup>6</sup> State Key Laboratory of High Performance Ceramics and Superfine Microstructure, Shanghai Institute of Ceramics, Chinese Academy of Sciences, 1295 Dingxi Road, Shanghai 200050, China

<sup>7</sup> School of Biomedical Engineering, Faculty of Engineering and Information Technology, University of Technology Sydney, Sydney, NSW 2007, Australia

\* Correspondence: hongxu.lyu@mail.sic.ac.cn (H.L.); xiaoxuehelen.xu@uts.edu.au (X.X.)

**Citation:** Huang, Y.; Du, Z.; Bao, G.; Fang, G.; Cappadona, M.; McClements, L.; Tuch, B.E.; Lu, H.; Xu, X. Smart Drug-Delivery System of Upconversion Nanoparticles Coated with Mesoporous Silica for Controlled Release. *Pharmaceutics* **2023**, *15*, 89. <https://doi.org/10.3390/pharmaceutics15010089>

Academic Editor: Avi Domb

Received: 22 November 2022

Revised: 19 December 2022

Accepted: 23 December 2022

Published: 27 December 2022

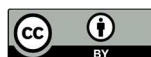

**Copyright:** © 2022 by the authors. Submitted for possible open access publication under the terms and conditions of the Creative Commons Attribution (CC BY) license (<https://creativecommons.org/licenses/by/4.0/>).

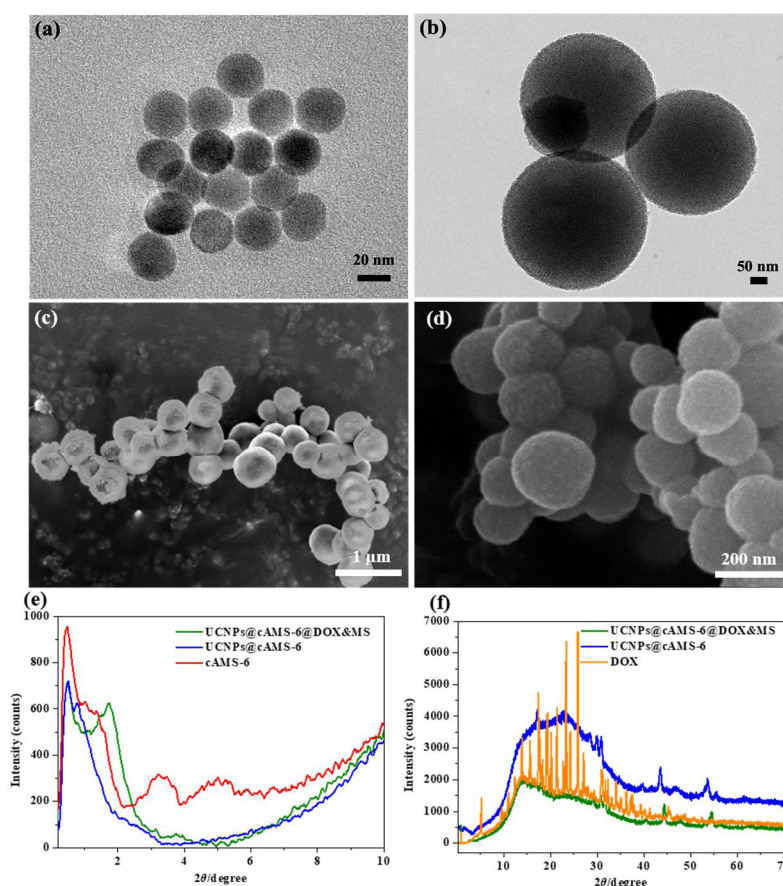

**Figure S1.** Properties of mesoporous particles of AMS-6, UCNPs@AMS-6 and UCNPs@AMS-6@DOX&MS. (a) Representative TEM image of the synthesized UCNPs. (b) representative TEM

images of cAMS-6. (c) SEM images of the cAMS-6 and (d) UCNPs@cAMS-6 nanoparticles, respectively. (e) Small-angle X-ray diffraction patterns of cAMS-6, UCNPs@cAMS-6 and UCNPs@cAMS-6@DOX&MS showing mesoscale diffraction peaks associated with the cubic mesostructure ( $a_0 = 116.5 \text{ \AA}$  for the calcined AMS-6). (f) Powder X-ray diffraction patterns of UCNPs@cAMS-6@DOX&MS compared to the pure Dox compound showing the absence of scattering peaks from crystalline drug.

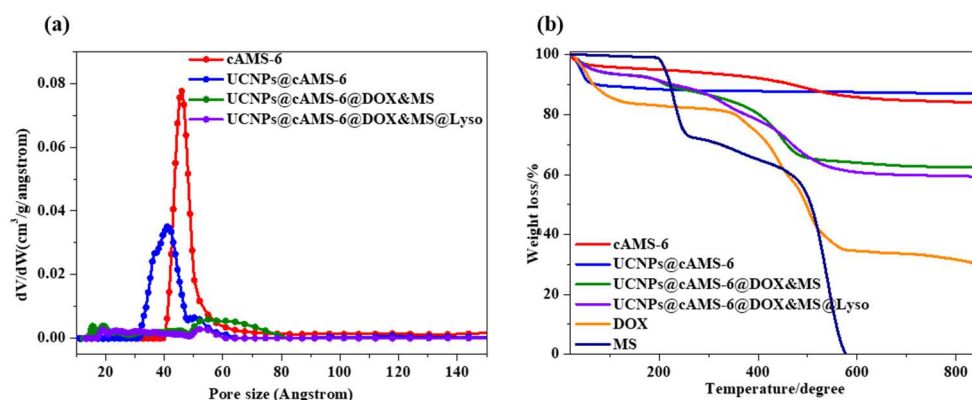

**Figure S2.** Drug loading and Protein Lysozyme coated UCNPs@cAMS-6. (a) Pore size distribution curve of cAMS-6, UCNPs@cAMS-6, UCNPs@cAMS-6@Dox/MS and UCNPs@cAMS-6@Dox/MS@Lyso samples. (b) Thermogravimetric analysis curves of cAMS-6, UCNPs@cAMS-6, UCNPs@cAMS-6@Dox/MS, UCNPs@cAMS-6@Dox/MS@Lyso, Dox and Molecule stirrer.

**Table S1.** Textural parameters of cAMS-6, UCNPs@cAMS-6, UCNPs@cAMS-6@Dox&MS and UCNPs@cAMS-6@Dox&MS@Lyso. The average pore volume, average pore size and surface area ( $P_{vol}$ ,  $P_{size}$  and  $S_{area}$ , respectively) are obtained from  $N_2$  adsorption measurements. The drug and Lysozyme content (%wt loss) was determined by thermogravimetric analysis. Data for Lysozyme coated particles was measured after washing unbound proteins (see supporting information experimental details).

| Sample                   | $P_{vol} (\text{cm}^3 \cdot \text{g}^{-1})$ | $P_{size} (\text{\AA})$ | $S_{area} (\text{m}^2 \cdot \text{g}^{-1})$ | %wt Lost |
|--------------------------|---------------------------------------------|-------------------------|---------------------------------------------|----------|
| cAMS-6                   | 0.77                                        | 46.50                   | 694.96                                      | 8.3      |
| UCNPs@cAMS-6             | 0.35                                        | 46.33                   | 446.54                                      | 13.0     |
| UCNPs@cAMS-6@Dox&MS      | 0.19                                        | 30.93                   | 240.39                                      | 37.5     |
| UCNPs@cAMS-6@Dox&MS@Lyso | 0.11                                        | 25.57                   | 156.12                                      | 41.31    |

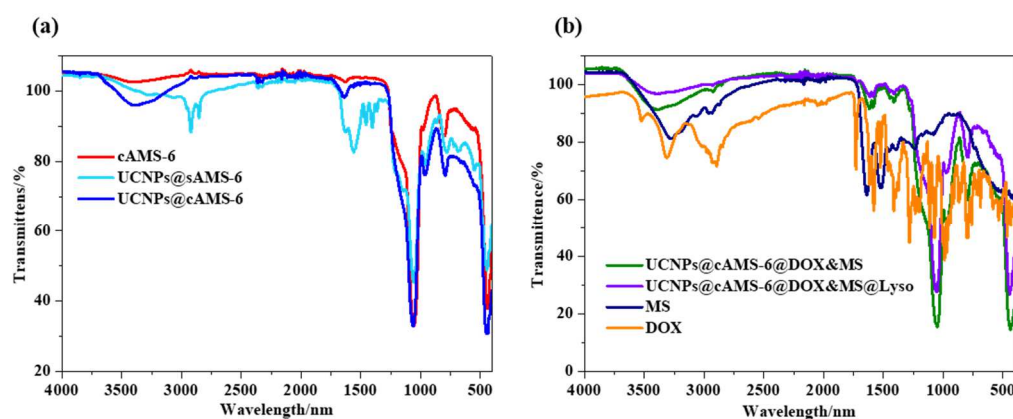

**Figure S3.** Fourier Transform Infrared (FT-IR) Spectra of (a) cAMS-6, UCNPs@sAMS-6, UCNPs@cAMS-6, and (b) UCNPs@cAMS-6@DOX&MS and UCNPs@cAMS-6@DOX&MS@Lyso samples. For comparison pure Dox and MS are also shown.

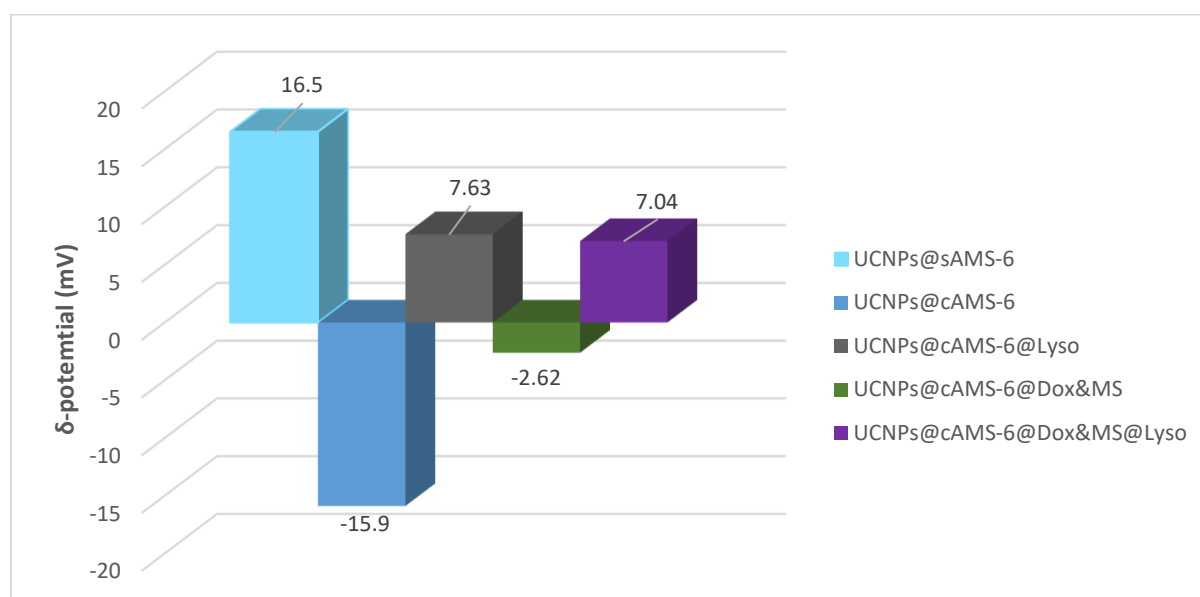

**Figure S4.** The zeta potential of UCNPs@sAMS-6, UCNPs@cAMS-6, UCNPs@cAMS-6@Lyso, UCNPs@cAMS-6@Dox&MS and UCNPs@cAMS-6@Dox&MS@Lyso samples.

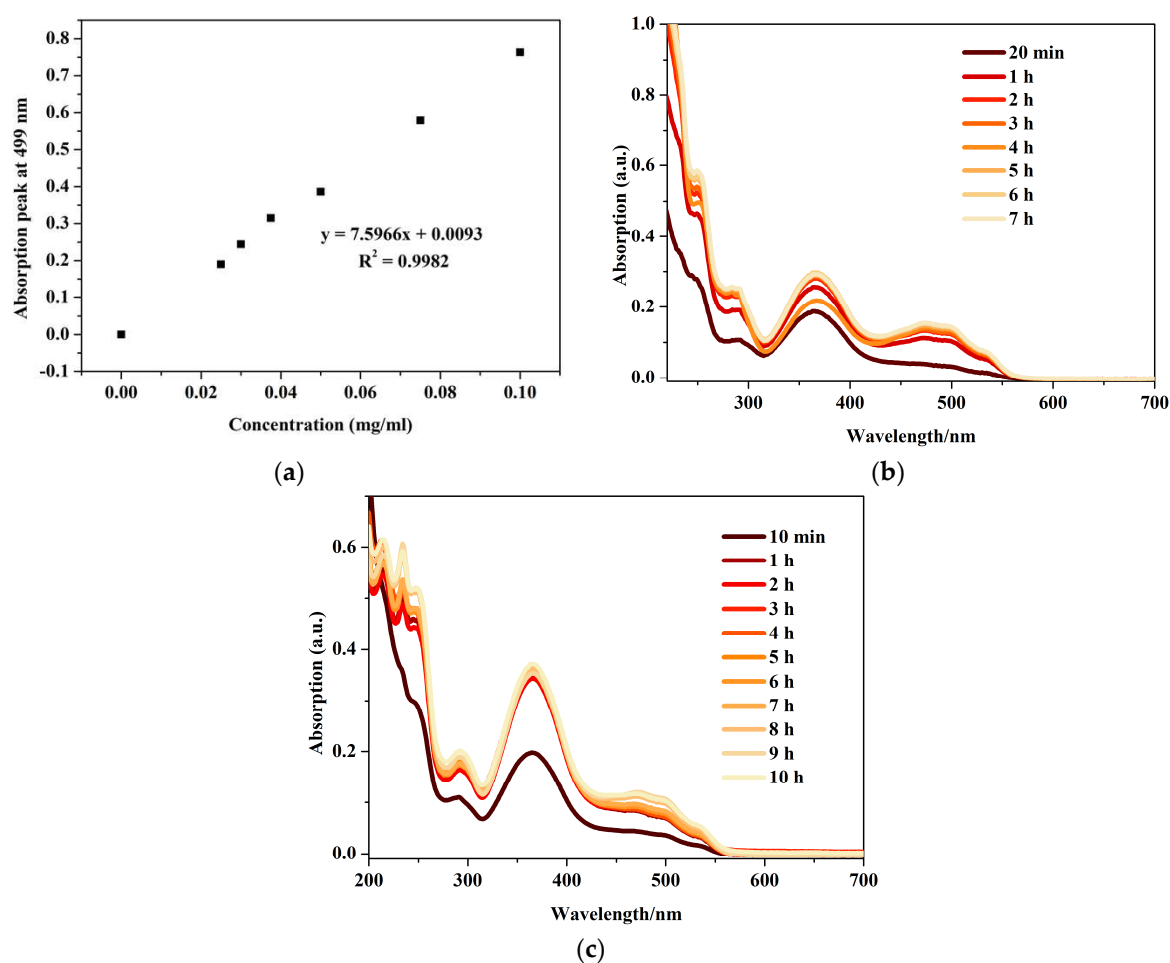

**Figure S5.** (a) Standard calibration curve of Dox at 499 nm; UV-Vis absorption profile of Dox absorption test in (b) UCNPs@cAMS-6@Dox&MS and (c) UCNPs@cAMS-6@Dox&MS@Lyso samples.

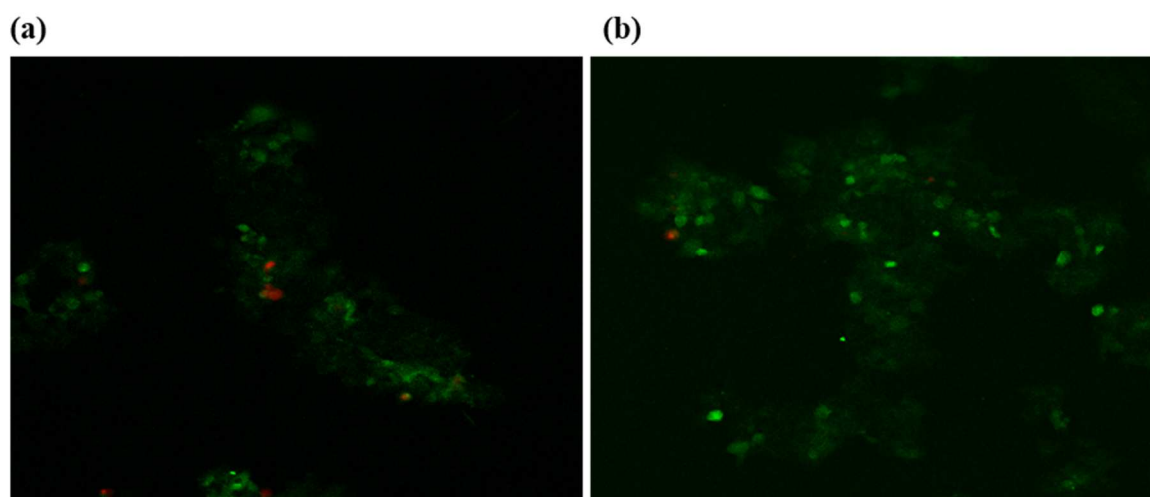

**Figure S6.** Confocal microscopic images of live (green) and dead (red) cells exposed to (a) UCNPs@cAMS-6 and (b) UCNPs@cAMS-6@Lyso. All images were taken under 10× objective lens.

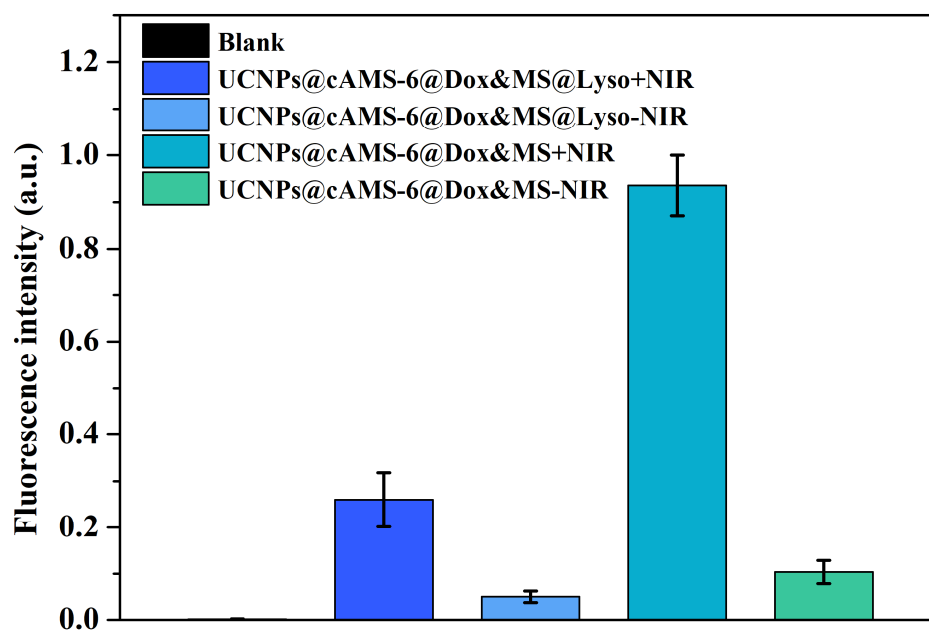

**Figure S7.** Fluorescence intensity in response to controlled release of Dox in all prepared samples.
